# Supplementary material
Source: PubMed Central journal article supplement (PMC3413201)
Supplement: NIHMS344101-supplement-01.pdf [file NIHMS344101-supplement-01.pdf]

## Supplementary Materials and Methods

### Gene Expression Profiling

Total RNA was isolated from fresh-frozen tissues and cell lines, and the RNA integrity (RIN > 5.5) was estimated using a 2100 Bioanalyzer (Agilent Technologie, Santa Cruz, CA). The concentration and purity were measured by NanoDrop 1000 (Thermo Scientific, Wilmington, DE) (ratio of the absorbance at 260 and 280 nm [ $A_{260}/A_{280}$ ] >2). A total of 200 ng total RNA was amplified and incubated for 16 hours at 37°C. Array hybridization, washing, Cy3-streptavidin labeling, and scanning were performed on an iScan using reagents and protocols supplied by the manufacturer (Illumina, San Diego, CA). A total of 750 ng biotinylated cRNA were hybridized to humanRef-8v2 BeadChips (Illumina) for 18 hours at 58°C. Image analysis and data extraction were automated using iScan control software. Microarray data are available at [www.ncbi.nlm.nih.gov/geo/](http://www.ncbi.nlm.nih.gov/geo/) (accession number GSE26566).

### Statistical Analysis

Data collection, preprocessing, and quantile normalization were performed with GenomeStudio v2010 as described in Andersen et al.<sup>1</sup> Genes were excluded from analysis if (1) expression levels less than 2-fold change as compared with the median expression values were found in more than 20% of samples, (2) variation in the  $\log_2$  ratio was less than the 75th percentile, and (3) more than 20% of data were missing (BRB-ArrayTools v3.8.1, National Institutes of Health).

The signature value was assessed on the basis of overall survival. Survival and time to recurrence (TTR) analyses were performed by the Kaplan-Meier method with use of log-rank statistics (Prism 5; GraphPad, La Jolla, CA). Outcome class association was performed by class random variance method to build a prediction model using 7 different prediction algorithms, including compound covariate predictor (CCP), diagonal linear discriminator (DLD), 1-nearest neighbor (1NN), 3-nearest neighbors (3NN), nearest centroid (NC), support vector machine (SVM), and Bayesian compound covariate (BCC). To estimate accuracy of the prediction model, random permutations during leave-one-out cross-validation (LOOCV) were repeated 1000 times. Class comparison was performed by means of univariate tests with random variance modeling (10,000 random permutations;  $P < .001$ ), depending on the number of classes. A global posttest was applied to test the significance of the gene set ( $P < .05$ ). Cox proportional hazards model and Wald statistics were used to identify genes significantly associated with survival ( $P < .01$ ). To estimate the accuracy, univariate permutation tests were repeated 10,000 times (BRB-ArrayTools v3.8.1). Functional annotation and pathways/networks analysis were performed by GSEA (MIT) and Ingenuity Pathway Analysis (IPA 8.7). The significance of

each network and their connectivity was estimated in IPA. Analyses of equal variance and normality were performed by Bartlett's test or D'Agostino & Pearson omnibus test, respectively ( $\alpha$  level at .05).

The differences between tumor epithelial and stromal compartments were assessed in 23 cases, and the significant genes were computed by means of paired bootstrap  $t$  test at  $P < .001$  with 5000 repetitions. Class prediction was performed using the random Forest method and random variance modeling. In quantitative trait analysis, we applied Pearson correlation tests. The  $P$  values for significant genes were calculated based on 10,000 random permutations. The nominal significance level of each univariate test was at  $P < .001$  (BRB-ArrayTools v3.8.1). The univariate and multivariate analyses of the clinical and pathological variables were performed using Fisher exact test and multivariate analysis ( $\alpha$  level at .01), respectively (JMP8). Within the multivariate analysis, all variables tested under the univariate analysis were analyzed; the significant pairwise partial correlations ( $r$ ) are given in Table 1. Integration of the data sets was performed following standardization using z-transformation. The cholangiocyte cell line H69 was used as a reference in generation of the cell line data set. Meta-analysis of the gene signature with publicly available data sets was performed in OncoPrint premium research edition v4.4 (Compenda Bioscience, Ann Arbor, MI).

### Laser Capture Microdissection

Tumor epithelial and stromal samples were microdissected from 23 patients using laser microdissection microscope LMD6000 (Leica, Buffalo Grove, IL). Frozen 10- $\mu$ m-thick serial tissue sections were attached to 2- $\mu$ m PEN-membrane slides (Leica). The first, middle, and last sections from each specimen were stained with H&E to confirm the presence of tumor tissue before dissection. Microdissection was followed by cresyl violet staining according to the manufacturer. Dissected material was collected directly into RNA extraction buffer (PicoPure RNA Isolation Kit; Arcturus Applied Biosystems, Foster City, CA) and stored at  $-80^\circ\text{C}$ . The total area of epithelial and stromal tissue was analyzed for each tumor dissected. Handling time per slide did not exceed 20 minutes. The selection criteria (RIN > 8) were determined based on the RNA quality. A total of 100 ng total RNA was amplified before array hybridization.

### Mutational Analysis

Genomic DNA isolated from tumor and surrounding noncancerous liver tissue was analyzed for mutations of *KRAS*, *BRAF*, and *EGFR* by quantitative polymerase chain reaction-based assays approved for in vitro diagnostics (CE-IVD). The mutation test kits, which use allele-specific probes to identify the presence of 11 mutations in *KRAS* codons 12, 13, and 61, one mutation in *BRAF* (V600E) (EntroGen Inc, Torzana, CA), and 28 mu-

tations in *EGFR* (Qiagen, Valencia, CA), are designed to detect a low percentage of mutant DNA in a background of wild-type genomic DNA. Genomic DNA (50 ng) was assayed using a control fluorophore to assess the total DNA in the samples. The analysis was performed on an iQ5 real-time polymerase chain reaction system (BioRad, Hercules, CA) and performed according to the manufacturer's specifications.

### **Cell Culture and Treatment**

Seven CCA cell lines were grown in Dulbecco's modified Eagle medium/F12 supplemented with 2 mmol/L L-glutamine, 1 U/mL penicillin/streptomycin, and 10% fetal calf serum. The normal cholangiocyte cell line (H69) was grown in BEGM (Lonza, Allendale, NJ) supplemented with a BEGM bullet kit, 2 mmol/L L-glutamine, 1 U/mL penicillin/streptomycin, and 10% fetal calf serum. Twenty-four hours before analysis, the culture medium was changed to Dulbecco's modified Eagle medium/F12. H69, KMCH, WITT, and KMBC were a gift from Dr G. J. Gores (Mayo Clinic, Rochester, MN). The remaining cholangiocarcinoma cell lines (YSCCC, HuCCT1, RBE, and SSP-25) were purchased from Riken BRC Cell Bank (Koyadai, Japan). Lapatinib (Tykerb; GlaxoSmithKline, Brentford, United Kingdom) was dissolved in dimethyl sulfoxide as a stock solution at 10 mmol/L and stored at  $-20^{\circ}\text{C}$ . Trastuzumab (Herceptin; Genentech, San Francisco, CA) was dissolved in sterile pyrogen water and stored at  $4^{\circ}\text{C}$ . Each cell line was treated with lapatinib at the 50% lethal dose ( $\text{LD}_{50}$ ) or 500  $\mu\text{g}/\text{mL}$  trastuzumab for 7 days. The assay was repeated 8 times. Media and reagents were changed every 3 days.

### **Cytotoxicity Assay**

The sensitivity of each cell line to either lapatinib or trastuzumab was measured using WST-1 colorimetric assay according to the manufacturer's protocol (Roche Applied Sciences, Indianapolis, IN). The cells were plated at a density of  $5 \times 10^4$  in 100  $\mu\text{L}$  Dulbecco's modified Eagle medium per well of a 96-well plate. After 24 hours, the cells were treated with 0–100  $\mu\text{mol}/\text{L}$  lapatinib or 0–500  $\mu\text{g}/\text{mL}$  trastuzumab and incubated for 72 hours

(Supplementary Figure 5). Absorbance of WST-1 was measured at 450 nm for 0.5–4 hours (M5; Molecular Devices, Sunnyvale, CA). Cell viability was defined as the absorbance of the treatment group compared with the control group and presented as percent change  $\pm$  SD. The experiment was repeated ( $n = 8$ ). The  $\text{LD}_{50}$  was estimated for each cell line using a nonlinear regression as log (inhibitor) versus variable normalized drug response  $\pm$  95% CI.

### **Immunohistochemical and Western Blot Analysis**

Serial 8- $\mu\text{m}$ -thick frozen sections were stained for MKI67, EGFR, MET, HER2, and pRPS6 (s235 and s244). Imaging was performed using a Zeiss 510 NLO confocal microscope (Carl Zeiss, Inc., Thornwood, NY) with a 20 $\times$  objective lens. Image brightness parameters were adjusted across all comparison groups. For each tumor, the *H*-score was calculated by multiplying the staining intensity score (0, none; 1, weak; 2, moderate; 3, intense) by the percentage of cells stained at a given intensity (0–100) by an observer blinded to the sample identity. Staining intensity was determined with Zen software (Zeiss) from triplicate random images. The total composition of epithelial and stromal area in each tumor was evaluated by CK19/4',6-diamidino-2-phenylindole (DAPI) stain and H&E sections and quantified by ImageJ v1.42 software. Western blotting was performed using antibodies against Tmprss4, Itga2, Ceacam6 (Abcam, Cambridge, MA), MET (Santa Cruz Biotechnology, Santa Cruz, CA), AKT, pAKT<sup>S473</sup>, EGFR, pEGFR<sup>Y1068</sup>, HER2, and pHER2<sup>Y877</sup> (Cell Signaling Technology, Darnes, MA) according to the manufacturer's recommendations.

### **Supplementary References**

31. Andersen JB, Factor VM, Marquardt JU, et al. An integrated genomic and epigenomic approach predicts therapeutic response to zebularine in human liver cancer. *Sci Transl Med* 2010;2:54ra77.
32. Woo HG, Lee JH, Yoon JH, et al. Identification of a cholangiocarcinoma-like gene expression trait in hepatocellular carcinoma. *Cancer Res* 2010;70:3034–3041.

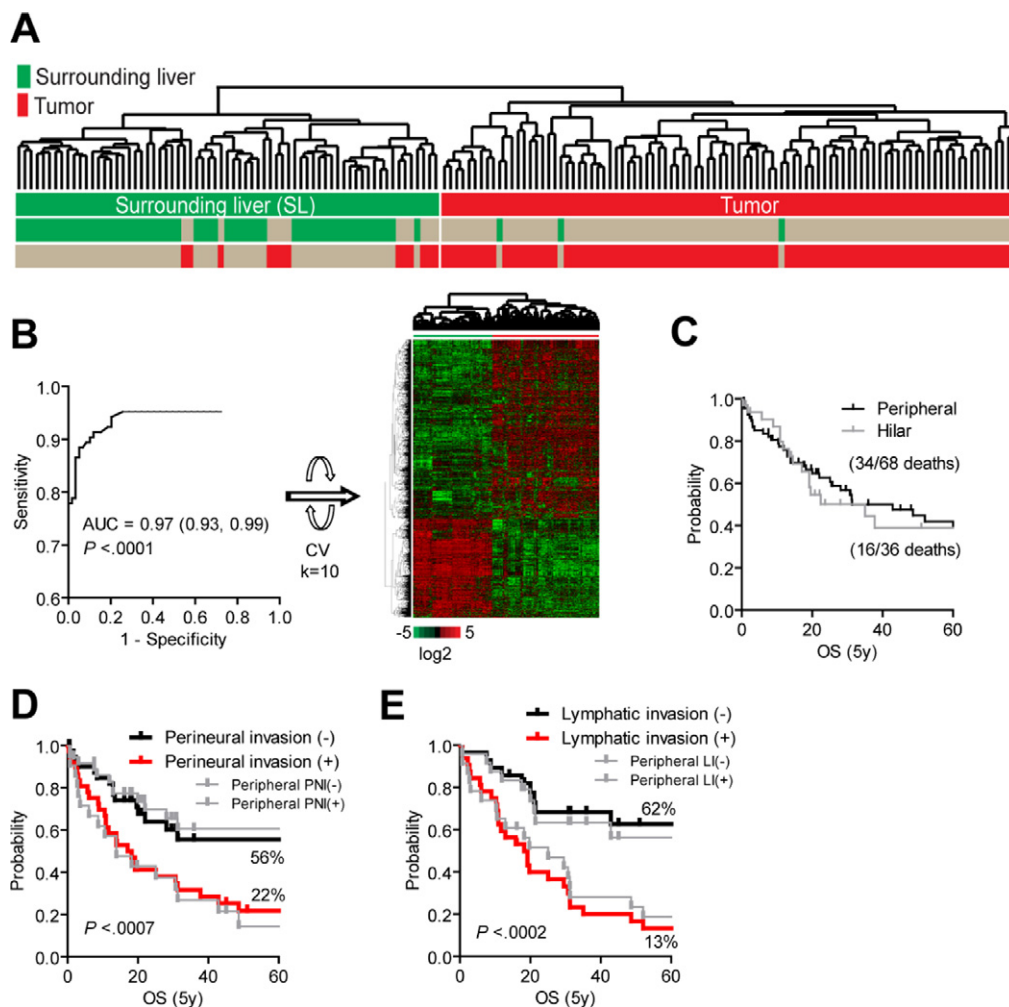

**Supplementary Figure 1.** Hierarchical cluster analysis and evaluation of the patient cohort. (A) Unsupervised hierarchical clustering of 104 fresh-frozen CCAs ( $n = 104$ ) and surrounding livers (SL,  $n = 59$ ) separates tissues into 2 groups representing SL and tumors. (B) Sensitivity of the gene list to correctly predict the classification. Threshold of predicted probability for a sample to belong to a group is 0.8 based on the Bayesian compound covariate predictor. The sample is predicted as SL if the likelihood is greater than the threshold. The specificity is represented by the area under the receiver and operating characteristic (ROC) curve (AUC, 95% CI) and is calculated following 10,000 random permutations during k-fold ( $k = 10$ ) cross-validation (CV) ( $P < .001$ ). (C) Survival analysis of patients according to anatomic location of the tumor. (D and E) Analysis of overall survival based on (D) positive (PNI+) and negative (PNI-) perineural invasion (PNI) and (E) positive (LI+) and negative (LI-) lymphatic invasion (LI) as independent prognostic predictors. Kaplan-Meier and log-rank statistics were used to determine levels of significance for 2 groups. The analysis for peripheral tumor only is presented in gray.

**Supplementary Table 1.** List of Classifier Genes

|    | Gene symbol | Parametric<br><i>P</i> value | CV<br>support<br>(%) | Geometric mean<br>(log <sub>2</sub> ratio in<br>class 1) | Geometric mean<br>(log <sub>2</sub> ratio in<br>class 2) | Ratio | Chromosomal<br>location |
|----|-------------|------------------------------|----------------------|----------------------------------------------------------|----------------------------------------------------------|-------|-------------------------|
| 1  | TMPRSS4     | <1e-07                       | 100                  | 3.69                                                     | 63.16                                                    | 0.058 | 11q23.3                 |
| 2  | BIK         | <1e-07                       | 100                  | 2.13                                                     | 8.83                                                     | 0.24  | 22q13.31                |
| 3  | SERPINB5    | <1e-07                       | 100                  | 4.39                                                     | 55.51                                                    | 0.079 | 18q21.3                 |
| 4  | KRT19       | <1e-07                       | 100                  | 5                                                        | 16.39                                                    | 0.3   | 17q21.2                 |
| 5  | TRIM31      | <1e-07                       | 100                  | 5.9                                                      | 40.38                                                    | 0.15  | 6p21.3                  |
| 6  | C13orf34    | <1e-07                       | 100                  | 2.25                                                     | 4.79                                                     | 0.47  | 13q22.1                 |
| 7  | CDH3        | <1e-07                       | 100                  | 14.07                                                    | 158.43                                                   | 0.089 | 16q22.1                 |
| 8  | CAPG        | <1e-07                       | 100                  | 3.93                                                     | 9.48                                                     | 0.42  | 2p11.2                  |
| 9  | CEACAM6     | <1e-07                       | 100                  | 2.65                                                     | 12.57                                                    | 0.21  | 19q13.2                 |
| 10 | IGFL2       | <1e-07                       | 100                  | 11.88                                                    | 106.2                                                    | 0.11  | 19q13.32                |
| 11 | HK2         | <1e-07                       | 100                  | 4.44                                                     | 15.02                                                    | 0.3   | 2p13                    |
| 12 | STYK1       | <1e-07                       | 100                  | 2.84                                                     | 9.74                                                     | 0.29  | 12p13.2                 |
| 13 | CEACAM5     | <1e-07                       | 100                  | 3.91                                                     | 61.27                                                    | 0.064 | 19q13.1-q13.2           |
| 14 | QPCT        | <1e-07                       | 100                  | 1.61                                                     | 4.15                                                     | 0.39  | 2p22.2                  |
| 15 | LAMB3       | <1e-07                       | 100                  | 8.06                                                     | 32.58                                                    | 0.25  | 1q32                    |
| 16 | TSPAN1      | <1e-07                       | 100                  | 2.9                                                      | 12.47                                                    | 0.23  | 1p34.1                  |
| 17 | SLC6A14     | <1e-07                       | 100                  | 24.01                                                    | 343.86                                                   | 0.07  | Xq23-q24                |
| 18 | RHBDL2      | <1e-07                       | 100                  | 1.84                                                     | 6.07                                                     | 0.3   | 1p34.3                  |
| 19 | MXRA5       | <1e-07                       | 100                  | 2.61                                                     | 7.38                                                     | 0.35  | Xp22.33                 |
| 20 | GPR92       | <1e-07                       | 100                  | 1.62                                                     | 3.94                                                     | 0.41  | 12p13.31                |
| 21 | CTSE        | <1e-07                       | 100                  | 3.4                                                      | 27.19                                                    | 0.13  | 1q31                    |
| 22 | ADAM8       | <1e-07                       | 100                  | 2.92                                                     | 8.33                                                     | 0.35  | 10q26.3                 |
| 23 | DTX2        | <1e-07                       | 100                  | 3.42                                                     | 6.78                                                     | 0.5   | 7q11.23                 |
| 24 | ASPHD2      | <1e-07                       | 100                  | 2.53                                                     | 7.56                                                     | 0.33  | 22q12.1                 |
| 25 | FLJ22662    | <1e-07                       | 100                  | 1.82                                                     | 5.12                                                     | 0.36  | 12p13.1                 |
| 26 | CYP2S1      | <1e-07                       | 100                  | 1.21                                                     | 8.55                                                     | 0.14  | 19q13.1                 |
| 27 | C20orf42    | <1e-07                       | 100                  | 10.38                                                    | 45.97                                                    | 0.23  | 20p12.3                 |
| 28 | ANKRD22     | <1e-07                       | 100                  | 3.63                                                     | 10.52                                                    | 0.34  | 10q23.31                |
| 29 | C19orf21    | <1e-07                       | 100                  | 5.76                                                     | 20.01                                                    | 0.29  | 19p13.3                 |
| 30 | COL11A1     | <1e-07                       | 100                  | 3.91                                                     | 15.88                                                    | 0.25  | 1p21                    |
| 31 | PSCA        | <1e-07                       | 100                  | 2.53                                                     | 29.37                                                    | 0.086 | 8q24.2                  |
| 32 | C19orf33    | <1e-07                       | 100                  | 4.85                                                     | 23.33                                                    | 0.21  | 19q13.2                 |
| 33 | GPR110      | 2.00E-07                     | 100                  | 1.81                                                     | 5.37                                                     | 0.34  | 6p12.3                  |
| 34 | ZBED2       | 1.00E-07                     | 100                  | 2.7                                                      | 10.71                                                    | 0.25  | 3q13.13                 |
| 35 | KRT17       | <1e-07                       | 100                  | 6.37                                                     | 48.71                                                    | 0.13  | 17q12-q21               |
| 36 | CD55        | 3.00E-07                     | 100                  | 1.37                                                     | 3.48                                                     | 0.39  | 1q32                    |
| 37 | ANLN        | 1.00E-07                     | 100                  | 3.83                                                     | 9.28                                                     | 0.41  | 7p15-p14                |
| 38 | KCNK1       | 2.00E-07                     | 100                  | 2.16                                                     | 4.27                                                     | 0.51  | 1q42-q43                |
| 39 | CORO2A      | 2.00E-07                     | 100                  | 2.25                                                     | 4.7                                                      | 0.48  | 9q22.3                  |
| 40 | ABHD9       | 4.00E-07                     | 100                  | 2.07                                                     | 6.37                                                     | 0.33  | 19p13.12                |
| 41 | ITGB6       | 5.00E-07                     | 100                  | 4.54                                                     | 16.04                                                    | 0.28  | 2q24.2                  |
| 42 | KLK7        | 9.00E-07                     | 100                  | 3                                                        | 22                                                       | 0.14  | 19q13.33                |
| 43 | PPP1R1B     | 1.00E-06                     | 100                  | 1.86                                                     | 5.5                                                      | 0.34  | 17q12                   |
| 44 | NRP2        | 1.30E-06                     | 100                  | 1.74                                                     | 3.78                                                     | 0.46  | 2q33.3                  |
| 45 | PLEK2       | 7.00E-07                     | 100                  | 4.89                                                     | 11.32                                                    | 0.43  | 14q23.3                 |
| 46 | C15orf48    | 1.20E-06                     | 100                  | 3.62                                                     | 11.04                                                    | 0.33  | 15q21.1                 |
| 47 | GJB5        | 2.80E-06                     | 100                  | 7.68                                                     | 50.71                                                    | 0.15  | 1p35.1                  |
| 48 | KIAA1199    | 1.00E-06                     | 100                  | 5.81                                                     | 20.24                                                    | 0.29  | 15q24                   |
| 49 | FA2H        | 1.50E-06                     | 100                  | 2.76                                                     | 7.01                                                     | 0.39  | 16q23                   |
| 50 | VDR         | 2.00E-06                     | 100                  | 2.88                                                     | 6.61                                                     | 0.44  | 12q13.11                |
| 51 | AP1S3       | 1.60E-06                     | 100                  | 4.47                                                     | 10.52                                                    | 0.42  | 2q36.1                  |
| 52 | PTPRR       | 2.20E-06                     | 100                  | 2.63                                                     | 10.02                                                    | 0.26  | 12q15                   |
| 53 | SLC4A11     | 1.50E-06                     | 100                  | 2.51                                                     | 5.5                                                      | 0.46  | 20p12                   |
| 54 | DAPP1       | 3.30E-06                     | 100                  | 2.65                                                     | 6.76                                                     | 0.39  | 4q25-q27                |
| 55 | MYEOV       | 2.10E-06                     | 100                  | 8.51                                                     | 38.82                                                    | 0.22  | 11q13                   |
| 56 | USP54       | 2.40E-06                     | 100                  | 4.7                                                      | 10.37                                                    | 0.45  | 10q22.2                 |
| 57 | SLC16A3     | 2.10E-06                     | 100                  | 2.75                                                     | 5.56                                                     | 0.49  | 17q25                   |
| 58 | GPR160      | 2.70E-06                     | 100                  | 2.36                                                     | 4.84                                                     | 0.49  | 3q26.2-q27              |
| 59 | TJP3        | 2.90E-06                     | 100                  | 2.21                                                     | 4.49                                                     | 0.49  | 19p13.3                 |
| 60 | MYH14       | 2.90E-06                     | 100                  | 1.93                                                     | 3.66                                                     | 0.53  | 19q13.33                |
| 61 | SCIN        | 3.00E-06                     | 100                  | 4.59                                                     | 13.85                                                    | 0.33  | 7p21.3                  |

Supplementary Table 1. Continued

|     | Gene symbol | Parametric<br>P value | CV<br>support<br>(%) | Geometric mean<br>(log <sub>2</sub> ratio in<br>class 1) | Geometric mean<br>(log <sub>2</sub> ratio in<br>class 2) | Ratio | Chromosomal<br>location |
|-----|-------------|-----------------------|----------------------|----------------------------------------------------------|----------------------------------------------------------|-------|-------------------------|
| 62  | S100P       | 4.60E-06              | 100                  | 4.25                                                     | 23.06                                                    | 0.18  | 4p16                    |
| 63  | CDCP1       | 3.60E-06              | 100                  | 3.72                                                     | 7.39                                                     | 0.5   | 3p21.31                 |
| 64  | FXYD3       | 5.80E-06              | 100                  | 3.14                                                     | 9.95                                                     | 0.32  | 19q13.11-q13.12         |
| 65  | BHLHB3      | 4.90E-06              | 100                  | 2.39                                                     | 4.75                                                     | 0.5   | 12p11.23-p12.1          |
| 66  | C1orf135    | 4.80E-06              | 100                  | 8.02                                                     | 21.8                                                     | 0.37  | 1p36.11                 |
| 67  | PPP1R14D    | 6.80E-06              | 100                  | 4.4                                                      | 16.97                                                    | 0.26  | 15q15.1                 |
| 68  | SFN         | 5.10E-06              | 100                  | 14.15                                                    | 44.98                                                    | 0.31  | 1p36.11                 |
| 69  | MSLN        | 9.20E-06              | 100                  | 7.61                                                     | 60.56                                                    | 0.13  | 16p13.3                 |
| 70  | ALDH3B1     | 6.90E-06              | 100                  | 2.04                                                     | 4.06                                                     | 0.5   | 11q13                   |
| 71  | HSH2D       | 6.10E-06              | 100                  | 5.06                                                     | 10.7                                                     | 0.47  | 19p13.11                |
| 72  | CLIC3       | 9.70E-06              | 100                  | 2.2                                                      | 8.48                                                     | 0.26  | 9q34.3                  |
| 73  | BCMO1       | 7.50E-06              | 100                  | 3.05                                                     | 9.38                                                     | 0.32  | 16q21-q23               |
| 74  | CDH17       | 8.40E-06              | 100                  | 4.64                                                     | 28.95                                                    | 0.16  | 8q22.1                  |
| 75  | REG4        | 1.05E-05              | 100                  | 2.99                                                     | 23.16                                                    | 0.13  | 1p13.1-p12              |
| 76  | LIPH        | 1.00E-05              | 100                  | 1.84                                                     | 3.35                                                     | 0.55  | 3q27                    |
| 77  | MYO1A       | 1.72E-05              | 100                  | 1.84                                                     | 10.36                                                    | 0.18  | 12q13-q14               |
| 78  | MTMR11      | 1.44E-05              | 100                  | 1.84                                                     | 3.61                                                     | 0.51  | 1q12-q21                |
| 79  | DHDH        | 1.41E-05              | 100                  | 2.4                                                      | 5.19                                                     | 0.46  | 19q13.3                 |
| 80  | SLC6A20     | 2.45E-05              | 100                  | 1.98                                                     | 4.73                                                     | 0.42  | 3p21.3                  |
| 81  | FAM83D      | 1.70E-05              | 100                  | 2.75                                                     | 5.19                                                     | 0.53  | 20q11.22-q12            |
| 82  | GPA33       | 2.19E-05              | 100                  | 1.78                                                     | 7.87                                                     | 0.23  | 1q24.1                  |
| 83  | NOXO1       | 2.45E-05              | 100                  | 2.56                                                     | 7.26                                                     | 0.35  | 16p13.3                 |
| 84  | NMU         | 2.84E-05              | 100                  | 15.65                                                    | 136.18                                                   | 0.11  | 4q12                    |
| 85  | ST6GALNAC1  | 3.70E-05              | 100                  | 2.2                                                      | 10.06                                                    | 0.22  | 17q25.1                 |
| 86  | APOBEC1     | 3.12E-05              | 100                  | 3.53                                                     | 15.58                                                    | 0.23  | 12p13.1                 |
| 87  | ITGA2       | 1.99E-05              | 100                  | 3.72                                                     | 7.17                                                     | 0.52  | 5q23-q31                |
| 88  | GPR87       | 2.50E-05              | 100                  | 3.99                                                     | 12.77                                                    | 0.31  | 3q24                    |
| 89  | CEP55       | 2.09E-05              | 100                  | 19.54                                                    | 42.94                                                    | 0.45  | 10q23.33                |
| 90  | HSPA1B      | 2.35E-05              | 100                  | 2.15                                                     | 3.59                                                     | 0.6   | 6p21.3                  |
| 91  | C1orf178    | 3.85E-05              | 100                  | 4.22                                                     | 17.6                                                     | 0.24  | 1p13.2                  |
| 92  | ST14        | 2.32E-05              | 100                  | 4.98                                                     | 9.49                                                     | 0.52  | 11q24-q25               |
| 93  | GJB3        | 2.90E-05              | 100                  | 20.22                                                    | 55.04                                                    | 0.37  | 1p34                    |
| 94  | SIX4        | 4.16E-05              | 100                  | 5.87                                                     | 12.84                                                    | 0.46  | 14q23                   |
| 95  | OLR1        | 4.35E-05              | 100                  | 3.87                                                     | 8.46                                                     | 0.46  | 12p13.2-p12.3           |
| 96  | BUB1        | 3.99E-05              | 100                  | 5.62                                                     | 10.45                                                    | 0.54  | 2q14                    |
| 97  | FGFBP1      | 5.56E-05              | 100                  | 5.52                                                     | 30.28                                                    | 0.18  | 4p16-p15                |
| 98  | VCAN        | 4.69E-05              | 100                  | 2.8                                                      | 5.22                                                     | 0.54  | 5q14.3                  |
| 99  | COL1A2      | 5.70E-05              | 100                  | 2.11                                                     | 3.9                                                      | 0.54  | 7q22.1                  |
| 100 | C1GALT1     | 5.57E-05              | 100                  | 2.18                                                     | 3.81                                                     | 0.57  | 7p14-p13                |
| 101 | CENPE       | 5.22E-05              | 100                  | 3.11                                                     | 5.32                                                     | 0.59  | 4q24-q25                |
| 102 | PTK6        | 5.89E-05              | 100                  | 4.01                                                     | 10.13                                                    | 0.4   | 20q13.3                 |
| 103 | DLG7        | 6.40E-05              | 100                  | 19.86                                                    | 45.71                                                    | 0.43  | 14q22.3                 |
| 104 | GPRC5A      | 9.33E-05              | 100                  | 3.51                                                     | 11.7                                                     | 0.3   | 12p13-p12.3             |
| 105 | KLK6        | 7.94E-05              | 100                  | 7.87                                                     | 41.24                                                    | 0.19  | 19q13.3                 |
| 106 | ELL3        | 8.43E-05              | 100                  | 2.38                                                     | 4.43                                                     | 0.54  | 15q15.3                 |
| 107 | MMP12       | 7.74E-05              | 100                  | 4.28                                                     | 13.38                                                    | 0.32  | 11q22.3                 |
| 108 | TPX2        | 7.53E-05              | 100                  | 3.11                                                     | 5.44                                                     | 0.57  | 20q11.2                 |
| 109 | SMPDL3B     | 9.40E-05              | 100                  | 2.59                                                     | 4.9                                                      | 0.53  | 1p35.3                  |
| 110 | CBLC        | 8.37E-05              | 100                  | 2.58                                                     | 4.15                                                     | 0.62  | 19q13.2                 |
| 111 | SPOCD1      | 0.0001007             | 100                  | 2.51                                                     | 4.86                                                     | 0.52  | 1p35.2                  |
| 112 | CKMT1B      | 0.0001279             | 100                  | 3.81                                                     | 13.61                                                    | 0.28  | 15q15                   |
| 113 | KLF5        | 0.0001351             | 100                  | 2.31                                                     | 5.24                                                     | 0.44  | 13q22.1                 |
| 114 | C9orf140    | 0.000112              | 100                  | 4.99                                                     | 9.2                                                      | 0.54  | 9q34.3                  |
| 115 | LGALS3      | 0.0001273             | 100                  | 2.02                                                     | 3.54                                                     | 0.57  | 14q21-q22               |
| 116 | OLFM4       | 0.0001666             | 100                  | 4.54                                                     | 28.16                                                    | 0.16  | 13q21.1                 |
| 117 | NFE2L3      | 0.0001243             | 100                  | 3.58                                                     | 6.55                                                     | 0.55  | 7p15-p14                |
| 118 | LGALS4      | 0.0001549             | 100                  | 2.38                                                     | 4.14                                                     | 0.58  | 19q13.2                 |
| 119 | MUC17       | 0.0002118             | 100                  | 3.01                                                     | 37.54                                                    | 0.08  | 7q22.1                  |
| 120 | KLK10       | 0.0001582             | 100                  | 3.08                                                     | 7.41                                                     | 0.42  | 19q13.3-q13.4           |



Supplementary Table 1. Continued

|     | Gene symbol | Parametric<br><i>P</i> value | CV<br>support<br>(%) | Geometric mean<br>(log <sub>2</sub> ratio in<br>class 1) | Geometric mean<br>(log <sub>2</sub> ratio in<br>class 2) | Ratio | Chromosomal location   |
|-----|-------------|------------------------------|----------------------|----------------------------------------------------------|----------------------------------------------------------|-------|------------------------|
| 121 | UNC93B1     | 0.0001401                    | 100                  | 3.61                                                     | 6.39                                                     | 0.57  | 11q13                  |
| 122 | TFCP2L1     | 0.0001655                    | 100                  | 5.74                                                     | 13.62                                                    | 0.42  | 2q14                   |
| 123 | KRT15       | 0.0001798                    | 100                  | 2.69                                                     | 6.46                                                     | 0.42  | 17q21.2                |
| 124 | SERPINB2    | 0.0002116                    | 100                  | 2.02                                                     | 6.04                                                     | 0.33  | 18q21.3                |
| 125 | TMC7        | 0.0001995                    | 100                  | 3.96                                                     | 7.89                                                     | 0.5   | 16p12.3                |
| 126 | KRT6B       | 0.0002213                    | 100                  | 2.99                                                     | 8.65                                                     | 0.35  | 12q12-q13              |
| 127 | UBE2C       | 0.0001866                    | 100                  | 6.52                                                     | 12.5                                                     | 0.52  | 20q13.12               |
| 128 | C20orf102   | 0.0002816                    | 100                  | 4.13                                                     | 14.51                                                    | 0.28  | 20q11.23               |
| 129 | VILL        | 0.0002957                    | 100                  | 1.55                                                     | 3.94                                                     | 0.39  | 3p21.3                 |
| 130 | MYB         | 0.0002687                    | 100                  | 1.7                                                      | 5.59                                                     | 0.3   | 6q22-q23               |
| 131 | SPIRE2      | 0.0002104                    | 100                  | 2.55                                                     | 4.82                                                     | 0.53  | 16q24                  |
| 132 | PKP3        | 0.0002312                    | 100                  | 33.57                                                    | 94.45                                                    | 0.36  | 11p15                  |
| 133 | SOX21       | 0.0002524                    | 100                  | 9.04                                                     | 33.42                                                    | 0.27  | 13q31-q32              |
| 134 | CDC20       | 0.0002162                    | 100                  | 4.24                                                     | 7.95                                                     | 0.53  | 1p34.1                 |
| 135 | CDX2        | 0.0002672                    | 100                  | 4.83                                                     | 19.19                                                    | 0.25  | 13q12.3                |
| 136 | PMAIP1      | 0.000233                     | 100                  | 4.98                                                     | 9.85                                                     | 0.51  | 18q21.32               |
| 137 | LOC201175   | 0.0002307                    | 100                  | 4.46                                                     | 9                                                        | 0.5   | 17q21.31               |
| 138 | PLAC8       | 0.0003352                    | 100                  | 2.3                                                      | 6.47                                                     | 0.36  | 4q21.22                |
| 139 | ANXA3       | 0.0002974                    | 100                  | 3.34                                                     | 6.06                                                     | 0.55  | 4q13-q22               |
| 140 | CDCA3       | 0.0002894                    | 100                  | 8.3                                                      | 16.65                                                    | 0.5   | 12p13                  |
| 141 | GPR35       | 0.0003212                    | 100                  | 3.26                                                     | 6.23                                                     | 0.52  | 2q37.3                 |
| 142 | PLA2G10     | 0.0003878                    | 100                  | 4.93                                                     | 18.95                                                    | 0.26  | 16p13.1-p12            |
| 143 | GALNT12     | 0.0004242                    | 96                   | 1.9                                                      | 4.23                                                     | 0.45  | 9q22.33                |
| 144 | WNK4        | 0.0004386                    | 100                  | 2.48                                                     | 6.69                                                     | 0.37  | 17q21-q22              |
| 145 | EVI1        | 0.0004515                    | 98                   | 2.1                                                      | 4.01                                                     | 0.52  | 3q24-q28               |
| 146 | LEMD1       | 0.0004187                    | 100                  | 28.77                                                    | 105.72                                                   | 0.27  | 1q32.1                 |
| 147 | PLAUR       | 0.0004512                    | 100                  | 1.89                                                     | 3.49                                                     | 0.54  | 19q13                  |
| 148 | THRC1       | 0.0004123                    | 100                  | 4.58                                                     | 8.17                                                     | 0.56  | 8q22.3                 |
| 149 | COL12A1     | 0.000436                     | 100                  | 2.27                                                     | 4.38                                                     | 0.52  | 6q12-q13               |
| 150 | TOP2A       | 0.0004306                    | 100                  | 9.44                                                     | 17.22                                                    | 0.55  | 17q21-q22              |
| 151 | KCNN4       | 0.0006333                    | 93                   | 3.94                                                     | 12.15                                                    | 0.32  | 19q13.2                |
| 152 | TUFT1       | 0.0005077                    | 100                  | 2.91                                                     | 4.52                                                     | 0.64  | 1q21                   |
| 153 | HOXB7       | 0.0005198                    | 100                  | 7.14                                                     | 18.81                                                    | 0.38  | 17q21.3                |
| 154 | BCL11B      | 0.0005385                    | 100                  | 1.96                                                     | 3.14                                                     | 0.62  | 14q32.2                |
| 155 | MYOM3       | 0.0007207                    | 82                   | 2.66                                                     | 5.14                                                     | 0.52  | 1p36.11                |
| 156 | CST6        | 0.0006506                    | 87                   | 2.85                                                     | 8.78                                                     | 0.32  | 11q13                  |
| 157 | KRT20       | 0.0006358                    | 91                   | 2.44                                                     | 8.25                                                     | 0.3   | 17q21.2                |
| 158 | CLDN4       | 0.0006104                    | 94                   | 7.36                                                     | 14.94                                                    | 0.49  | 7q11.23                |
| 159 | C1orf116    | 0.0006471                    | 89                   | 4.24                                                     | 7.12                                                     | 0.6   | 1q32.1                 |
| 160 | TTK         | 0.0006426                    | 90                   | 22.57                                                    | 45.22                                                    | 0.5   | 6q13-q21               |
| 161 | AURKA       | 0.0006382                    | 92                   | 3.25                                                     | 5.19                                                     | 0.63  | 20q13.2-q13.3          |
| 162 | SCEL        | 0.0006848                    | 83                   | 2.62                                                     | 4.86                                                     | 0.54  | 13q22                  |
| 163 | EPS8L1      | 0.0006661                    | 84                   | 4.53                                                     | 8.73                                                     | 0.52  | 19q13.42               |
| 164 | KIF11       | 0.0006852                    | 78                   | 7.69                                                     | 13.4                                                     | 0.57  | 10q24.1                |
| 165 | KIF15       | 0.0007712                    | 76                   | 11.81                                                    | 24.78                                                    | 0.48  | 3p21.31                |
| 166 | GCNT3       | 0.0008445                    | 65                   | 4.12                                                     | 8.83                                                     | 0.47  | 15q21.3                |
| 167 | NOX4        | 0.0007878                    | 66                   | 2.44                                                     | 4.1                                                      | 0.59  | 11q14.2-q21            |
| 168 | SLC39A4     | 0.0007941                    | 64                   | 2.94                                                     | 5.31                                                     | 0.55  | 8q24.3                 |
| 169 | GALNT6      | 0.0008233                    | 59                   | 2                                                        | 3.27                                                     | 0.61  | 12q13                  |
| 170 | CCNB2       | 0.0007994                    | 66                   | 8.27                                                     | 14.4                                                     | 0.57  | 15q22.2                |
| 171 | COL6A3      | 0.0008961                    | 58                   | 2.37                                                     | 3.91                                                     | 0.6   | 2q37                   |
| 172 | LAMC2       | 0.0008651                    | 52                   | 14.06                                                    | 30.29                                                    | 0.46  | 1q25-q31               |
| 173 | DKK1        | 0.0009629                    | 47                   | 9.48                                                     | 31.23                                                    | 0.3   | 10q11.2                |
| 174 | CTSL2       | 0.0008904                    | 50                   | 7.08                                                     | 15.42                                                    | 0.46  | 9q22.2                 |
| 175 | GJB4        | 0.0009991                    | 44                   | 3.45                                                     | 7.37                                                     | 0.47  | 1p34.3                 |
| 176 | HIST1H1C    | 0.0008892                    | 62                   | 3.26                                                     | 1.92                                                     | 1.7   | 6p21.3                 |
| 177 | SLC5A9      | 0.0008602                    | 71                   | 4.6                                                      | 2.29                                                     | 2     | 1p33                   |
| 178 | CRYBB2      | 0.0007377                    | 75                   | 3.56                                                     | 2.11                                                     | 1.69  | 22q11.2-q12.1 22q11.23 |
| 179 | CLDN9       | 0.0007351                    | 77                   | 5.69                                                     | 2.56                                                     | 2.22  | 16p13.3                |
| 180 | SMA4        | 0.0006846                    | 81                   | 3.3                                                      | 1.96                                                     | 1.69  | 5q13                   |

Supplementary Table 1. Continued

|     | Gene symbol | Parametric<br>P value | CV<br>support<br>(%) | Geometric mean<br>(log <sub>2</sub> ratio in<br>class 1) | Geometric mean<br>(log <sub>2</sub> ratio in<br>class 2) | Ratio | Chromosomal<br>location |
|-----|-------------|-----------------------|----------------------|----------------------------------------------------------|----------------------------------------------------------|-------|-------------------------|
| 181 | UBD         | 0.0005445             | 100                  | 5.18                                                     | 2.88                                                     | 1.8   | 6p21.3                  |
| 182 | VN1R1       | 0.0005996             | 89                   | 13.42                                                    | 6.13                                                     | 2.19  | 19q13.4                 |
| 183 | PGBD5       | 0.0004749             | 100                  | 4.68                                                     | 2.66                                                     | 1.76  | 1q42.13                 |
| 184 | PTPN14      | 0.0003083             | 100                  | 5.49                                                     | 3.29                                                     | 1.67  | 1q32.2                  |
| 185 | OXTR        | 0.0002728             | 100                  | 12.64                                                    | 5.24                                                     | 2.41  | 3p25                    |
| 186 | PTHLH       | 0.00028               | 100                  | 4.1                                                      | 1.93                                                     | 2.13  | 12p12.1-p11.2           |
| 187 | TCF2        | 0.0002788             | 100                  | 3.89                                                     | 2.21                                                     | 1.76  | 17cen-q21.3             |
| 188 | ZDHHC1      | 0.0002288             | 100                  | 3.64                                                     | 2.25                                                     | 1.62  | 16q22.1                 |
| 189 | HIST1H4H    | 0.0002183             | 100                  | 5.51                                                     | 2.64                                                     | 2.09  | 6p21.3                  |
| 190 | ABHD3       | 0.0002191             | 100                  | 3.21                                                     | 1.97                                                     | 1.63  | 18q11.2                 |
| 191 | CRYM        | 0.0002023             | 100                  | 3.47                                                     | 1.84                                                     | 1.88  | 16p13.11-p12.3          |
| 192 | FAM59A      | 0.0001592             | 100                  | 3.37                                                     | 2.16                                                     | 1.57  | 18q12.1                 |
| 193 | C1QL4       | 2.00E-04              | 100                  | 8.19                                                     | 2.77                                                     | 2.96  | 12q13.12                |
| 194 | TNFRSF12A   | 0.0001169             | 100                  | 4.37                                                     | 2.76                                                     | 1.58  | 16p13.3                 |
| 195 | GGT6        | 0.0001818             | 100                  | 8.53                                                     | 3.56                                                     | 2.39  | 17p13.2                 |
| 196 | ATP1A1      | 8.92E-05              | 100                  | 3.7                                                      | 2.24                                                     | 1.65  | 1p21                    |
| 197 | SYT12       | 0.0001143             | 100                  | 4.47                                                     | 1.94                                                     | 2.31  | 11q13.1                 |
| 198 | ANKRD1      | 8.31E-05              | 100                  | 17.62                                                    | 5.64                                                     | 3.12  | 10q23.31                |
| 199 | PAQR5       | 7.51E-05              | 100                  | 17.43                                                    | 7.12                                                     | 2.45  | 15q23                   |
| 200 | PSPH        | 7.12E-05              | 100                  | 4.3                                                      | 2.39                                                     | 1.79  | 7p15.2-p15.1            |
| 201 | CTXN1       | 6.28E-05              | 100                  | 4.21                                                     | 2.33                                                     | 1.81  | 19p13.2                 |
| 202 | SCTR        | 7.12E-05              | 100                  | 7.5                                                      | 2.66                                                     | 2.82  | 2q14.1                  |
| 203 | FAM38B      | 4.75E-05              | 100                  | 3.79                                                     | 2.21                                                     | 1.72  | 18p11.22                |
| 204 | C9orf150    | 4.63E-05              | 100                  | 3.6                                                      | 2.04                                                     | 1.77  | 9p23                    |
| 205 | PATZ1       | 4.90E-05              | 100                  | 6.01                                                     | 3.05                                                     | 1.97  | 22q12.2                 |
| 206 | FGFR2       | 5.80E-05              | 100                  | 4.41                                                     | 1.88                                                     | 2.35  | 10q26                   |
| 207 | CDH6        | 5.20E-05              | 100                  | 4.58                                                     | 1.73                                                     | 2.65  | 5p15.1-p14              |
| 208 | PKHD1       | 3.22E-05              | 100                  | 6.99                                                     | 2.54                                                     | 2.75  | 6p12.2                  |
| 209 | DEFB1       | 2.78E-05              | 100                  | 3.87                                                     | 1.97                                                     | 1.96  | 8p23.2-p23.1            |
| 210 | MLH3        | 1.64E-05              | 100                  | 4.92                                                     | 2.84                                                     | 1.73  | 14q24.3                 |
| 211 | KIAA0802    | 1.03E-05              | 100                  | 3.77                                                     | 2.1                                                      | 1.79  | 18p11.22                |
| 212 | CXCL6       | 1.07E-05              | 100                  | 8.67                                                     | 3.21                                                     | 2.71  | 4q21                    |
| 213 | RGS4        | 4.90E-06              | 100                  | 8.06                                                     | 2.62                                                     | 3.07  | 1q23.3                  |
| 214 | DBNDD1      | 4.10E-06              | 100                  | 6.18                                                     | 3.33                                                     | 1.85  | 16q24.3                 |
| 215 | KCNF1       | 4.50E-06              | 100                  | 7.97                                                     | 2.97                                                     | 2.68  | 2p25                    |
| 216 | VTCN1       | 6.90E-06              | 100                  | 6.38                                                     | 1.89                                                     | 3.38  | 1p13.1                  |
| 217 | KRT23       | 3.50E-06              | 100                  | 52.84                                                    | 12.31                                                    | 4.29  | 17q21.2                 |
| 218 | NME5        | 6.20E-06              | 100                  | 5.68                                                     | 2.01                                                     | 2.83  | 5q31                    |
| 219 | HKDC1       | 2.30E-06              | 100                  | 10.1                                                     | 4.86                                                     | 2.08  | 10q21.3                 |
| 220 | MPP6        | 2.40E-06              | 100                  | 3.58                                                     | 1.69                                                     | 2.12  | 7p15                    |
| 221 | SLC4A3      | 1.50E-06              | 100                  | 16                                                       | 4.56                                                     | 3.51  | 2q36                    |
| 222 | C10orf132   | 1.00E-06              | 100                  | 13.47                                                    | 4.46                                                     | 3.02  | 10q24.2                 |
| 223 | TMEM156     | 8.00E-07              | 100                  | 9.67                                                     | 3.15                                                     | 3.07  | 4p14                    |
| 224 | RGS14       | 4.00E-07              | 100                  | 3.89                                                     | 2.09                                                     | 1.86  | 5q35.3                  |
| 225 | VEPH1       | 6.00E-07              | 100                  | 10.42                                                    | 3.01                                                     | 3.46  | 3q24-q25                |
| 226 | GMNN        | 2.00E-07              | 100                  | 6.96                                                     | 2.59                                                     | 2.69  | 6p22.2                  |
| 227 | SPP1        | 2.00E-07              | 100                  | 6.72                                                     | 2.94                                                     | 2.29  | 4q21-q25                |
| 228 | FLJ23861    | 3.00E-07              | 100                  | 3.79                                                     | 1.62                                                     | 2.34  | 2q34                    |
| 229 | LOXL4       | <1e-07                | 100                  | 5.94                                                     | 2.37                                                     | 2.5   | 10q24                   |
| 230 | CSPP1       | <1e-07                | 100                  | 3.99                                                     | 1.48                                                     | 2.7   | 8q13.2                  |
| 231 | WNK2        | 2.00E-07              | 100                  | 6.01                                                     | 2.12                                                     | 2.83  | 9q22.3                  |
| 232 | NUAK2       | <1e-07                | 100                  | 7.77                                                     | 2.71                                                     | 2.87  | 1q32.1                  |
| 233 | ITIH5       | <1e-07                | 100                  | 9.26                                                     | 1.82                                                     | 5.08  | 10p14                   |
| 234 | MCCC2       | <1e-07                | 100                  | 4.53                                                     | 2.21                                                     | 2.05  | 5q12-q13                |
| 235 | GAL3ST1     | <1e-07                | 100                  | 12.77                                                    | 2.65                                                     | 4.82  | 22q12.2                 |
| 236 | SMYD2       | <1e-07                | 100                  | 3.81                                                     | 1.66                                                     | 2.3   | 1q41                    |
| 237 | DCDC2       | <1e-07                | 100                  | 19.64                                                    | 3.06                                                     | 6.42  | 6p22.1                  |
| 238 | LPGAT1      | <1e-07                | 100                  | 3.57                                                     | 1.5                                                      | 2.37  | 1q32                    |

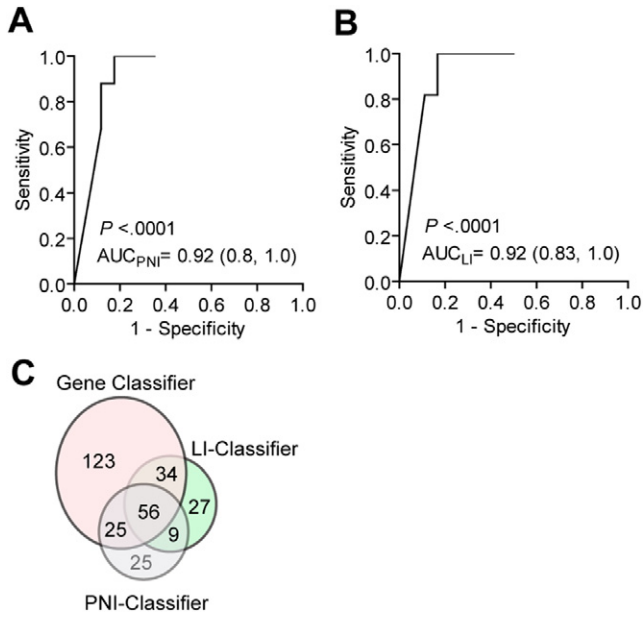

**Supplementary Figure 2.** Perineural invasion (PNI) and lymphatic invasion (LI) as predictors of overall survival. (A and B) Class prediction using (A) PNI and (B) LI as predictors of survival, respectively. The specificity is represented by the area under the ROC curve (AUC, 95% CI) using Bayesian compound covariate predictor modeling. (C) Venn diagram analysis of the overlap between our 238-gene classifier and PNI and LI predictors.



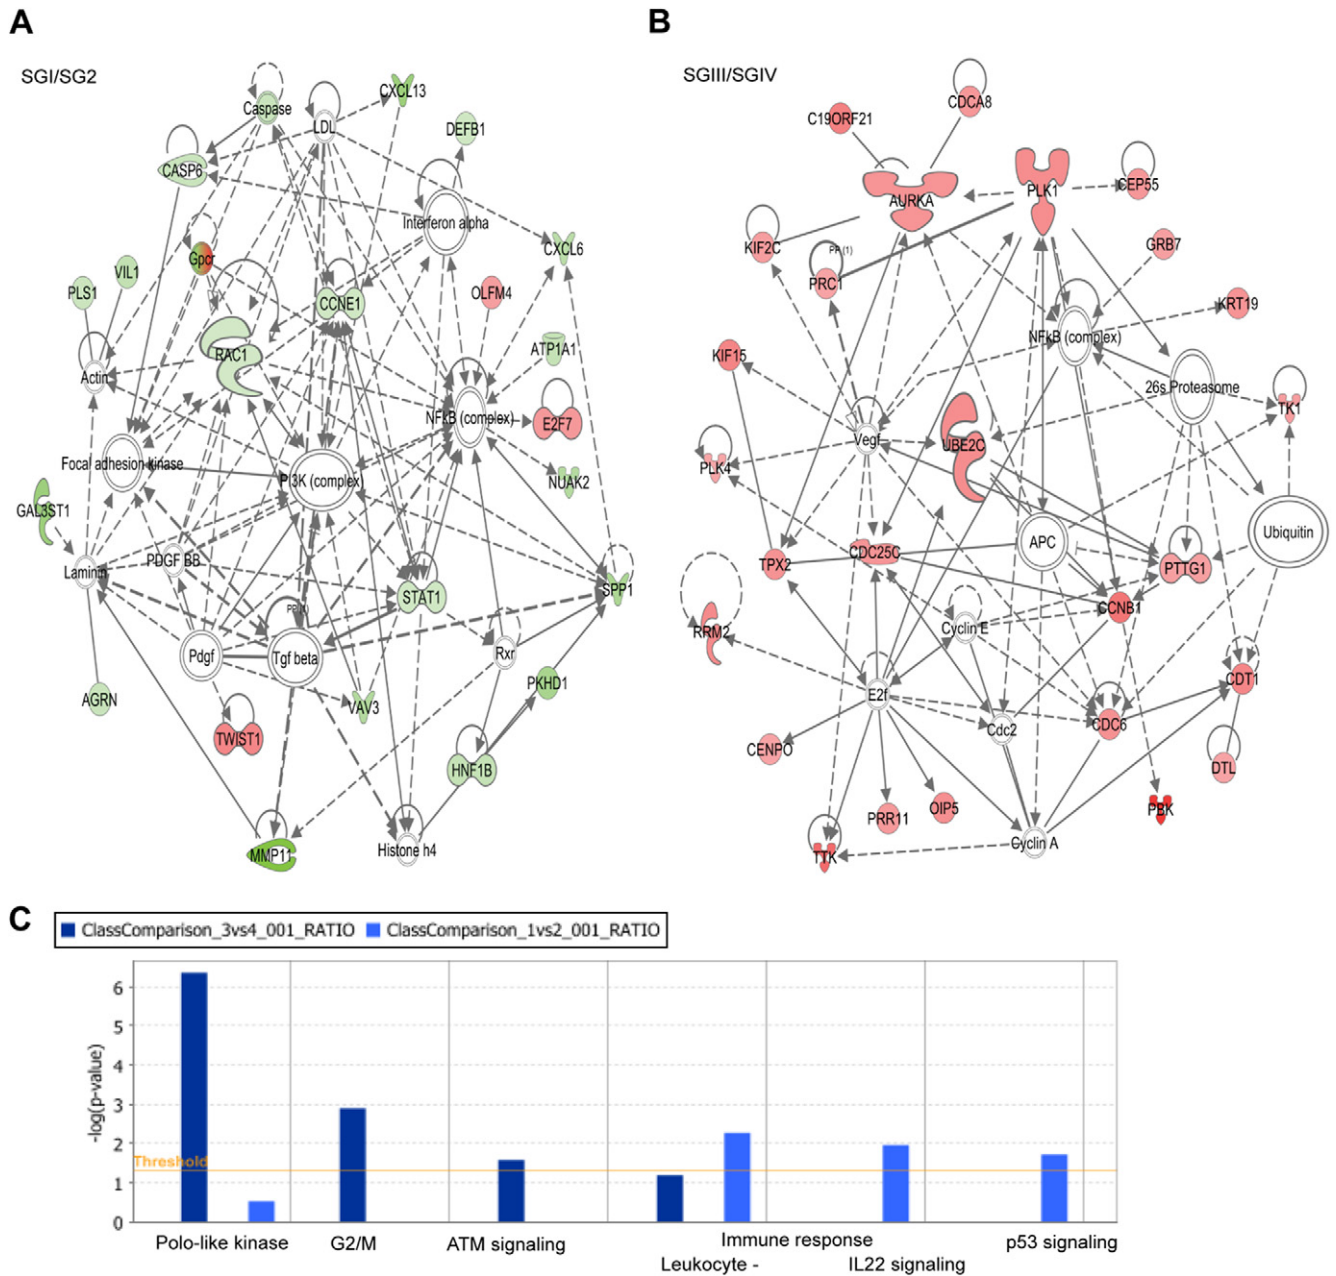

**Supplementary Figure 3.** Functional network analysis. (A and B) The top networks differentially expressed between subgroups (A) SGI/SGII and (B) SGIII/SGIV. Up-regulated and down-regulated genes are shown in red and green, respectively. Dashed lines represent indirect connectivity. (C) The significant canonical pathways differentiating SGI/SGII (light blue) versus SGIII/SGIV (dark blue).  $P < .05$  by Fisher exact test.

**Supplementary Table 2.** List of Survival Genes and Network Association

|    | Gene symbol | Parametric<br><i>P</i> value | Permutation<br><i>P</i> value | Hazard ratio | Network             |
|----|-------------|------------------------------|-------------------------------|--------------|---------------------|
| 1  | CDH3        | .000144                      | 3.00E-04                      | 1.348        | CTNNB1/MYC          |
| 2  | SCEL        | .000627                      | 8.00E-04                      | 1.551        | CTNNB1/MYC          |
| 3  | CORO2A      | .00077                       | 7.00E-04                      | 1.739        | CTNNB1/MYC          |
| 4  | QPCT        | .000962                      | 7.00E-04                      | 1.67         | CTNNB1/MYC          |
| 5  | ANLN        | .001047                      | .0012                         | 1.534        | CTNNB1/MYC          |
| 6  | VTCN1       | .001535                      | 9.00E-04                      | 0.557        | CTNNB1/MYC          |
| 7  | CDCP1       | .002632                      | .003                          | 1.642        | CTNNB1/MYC          |
| 8  | KRT17       | .00328                       | .0031                         | 1.182        | CTNNB1/MYC          |
| 9  | SYT12       | .003786                      | .0034                         | 0.531        | CTNNB1/MYC          |
| 10 | SIX4        | .004195                      | .0046                         | 1.413        | CTNNB1/MYC          |
| 11 | CEACAM6     | .00917                       | .0064                         | 1.366        | CTNNB1/MYC          |
| 12 | ADAM8       | .000166                      | 1.00E-04                      | 1.581        | TNF                 |
| 13 | GPR110      | .000208                      | 1.00E-07                      | 1.744        | TNF                 |
| 14 | SPOCD1      | .002228                      | .0019                         | 1.638        | TNF                 |
| 15 | NUAK2       | .007836                      | .008                          | 0.675        | TNF                 |
| 16 | ITGA2       | 1.59E-05                     | 1.00E-07                      | 2.015        | VEGF/ERRB           |
| 17 | PLEK2       | .000319                      | 1.00E-07                      | 1.647        | VEGF/ERRB           |
| 18 | KRT19       | .000516                      | 4.00E-04                      | 1.714        | VEGF/ERRB           |
| 19 | CST6        | .001502                      | .0018                         | 1.318        | VEGF/ERRB           |
| 20 | TMPRSS4     | .002066                      | .0014                         | 1.313        | VEGF/ERRB           |
| 21 | GJB3        | .00284                       | .0025                         | 1.389        | VEGF/ERRB           |
| 22 | UBE2C       | .003421                      | .0027                         | 1.468        | VEGF/ERRB           |
| 23 | CDC20       | .003436                      | .0031                         | 1.47         | VEGF/ERRB           |
| 24 | NRP2        | .003883                      | .0038                         | 1.596        | VEGF/ERRB           |
| 25 | MTMR11      | .007299                      | .0053                         | 1.617        | VEGF/ERRB           |
| 26 | TPX2        | .009626                      | .0081                         | 1.397        | VEGF/ERRB           |
| 27 | FXYD3       | .009634                      | .0082                         | 1.374        | VEGF/ERRB           |
| 28 | HK2         | .009794                      | .0094                         | 1.342        | VEGF/ERRB           |
| 29 | TTK         | .009948                      | .0095                         | 1.346        | VEGF/ERRB           |
| 30 | LOC201175   | .000153                      | 1.00E-07                      | 1.829        | Unknown association |
| 31 | C15orf48    | .004142                      | .0035                         | 1.422        | Unknown association |
| 32 | C19orf33    | .004256                      | .004                          | 1.395        | Unknown association |
| 33 | ASPHD2      | .004468                      | .0029                         | 1.532        | Unknown association |
| 34 | GALNT6      | .005952                      | .0049                         | 1.461        | Unknown association |
| 35 | C9orf140    | .008904                      | .0083                         | 1.411        | Unknown association |
| 36 | CLIC3       | .009536                      | .0073                         | 1.309        | Unknown association |

**Supplementary Table 3.** Quantitative Trait Analysis (Molecular Functions)

| GO ID      | GO term                                      | Observed | Expected | Observed/expected |
|------------|----------------------------------------------|----------|----------|-------------------|
| GO:0050431 | TGF- $\beta$ binding                         | 5        | 1.23     | 4.05              |
| GO:0032813 | TNFR superfamily binding                     | 5        | 1.44     | 3.47              |
| GO:0004181 | Metallocarboxypeptidase activity             | 7        | 2.06     | 3.4               |
| GO:0008235 | Metalloexopeptidase activity                 | 8        | 2.47     | 3.24              |
| GO:0005044 | Scavenger receptor activity                  | 8        | 2.47     | 3.24              |
| GO:0004715 | Protein tyrosine kinase activity             | 6        | 1.85     | 3.24              |
| GO:0005507 | Copper ion binding                           | 7        | 2.26     | 3.09              |
| GO:0005520 | IGF binding                                  | 6        | 2.06     | 2.92              |
| GO:0001948 | Glycoprotein binding                         | 6        | 2.06     | 2.92              |
| GO:0001653 | Peptide receptor activity                    | 6        | 2.06     | 2.92              |
| GO:0008528 | Peptide receptor activity, G-protein coupled | 5        | 1.85     | 2.7               |
| GO:0005100 | Rho GTPase activator activity                | 5        | 1.85     | 2.7               |
| GO:0004180 | Carboxypeptidase activity                    | 8        | 3.09     | 2.59              |
| GO:0051015 | Actin filament binding                       | 9        | 3.91     | 2.3               |
| GO:0005099 | Ras GTPase activator activity                | 6        | 2.88     | 2.08              |
| GO:0004888 | Transmembrane receptor activity              | 73       | 36.4     | 2.01              |
| GO:0008081 | Phosphoric diester hydrolase activity        | 7        | 3.5      | 2                 |

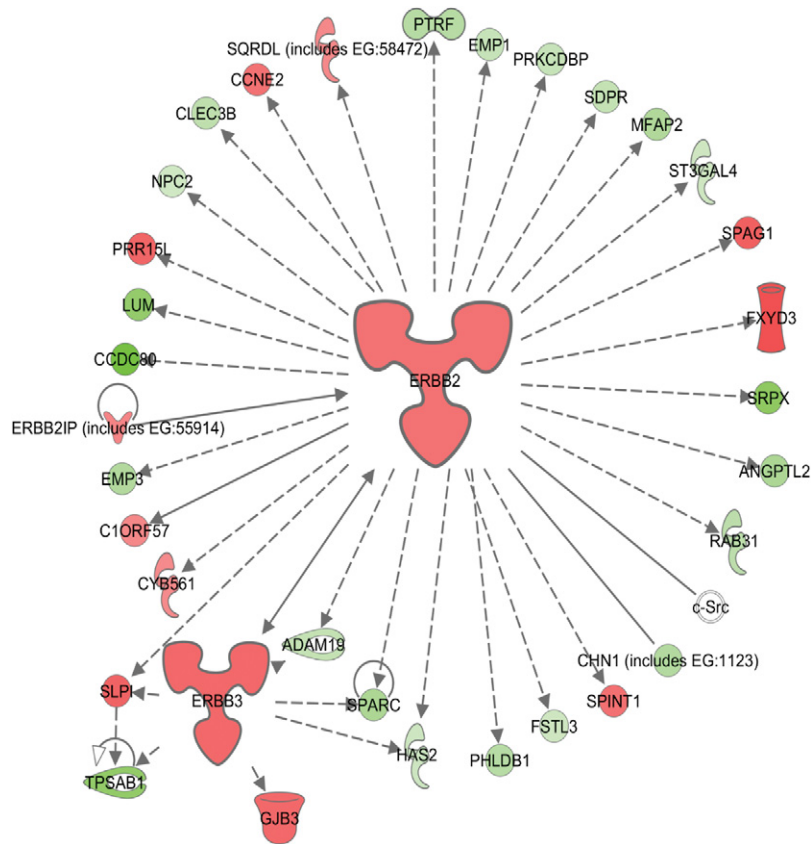

**Supplementary Figure 4.** Network analysis of the tumor microenvironment. Ingenuity Pathway Analysis tools were used to analyze the 1442 genes differentially expressed genes between the epithelial and stromal cell compartments. Up-regulated and down-regulated genes in tumor epithelium are shown in red and green, respectively. Dashed lines represent indirect connectivity.

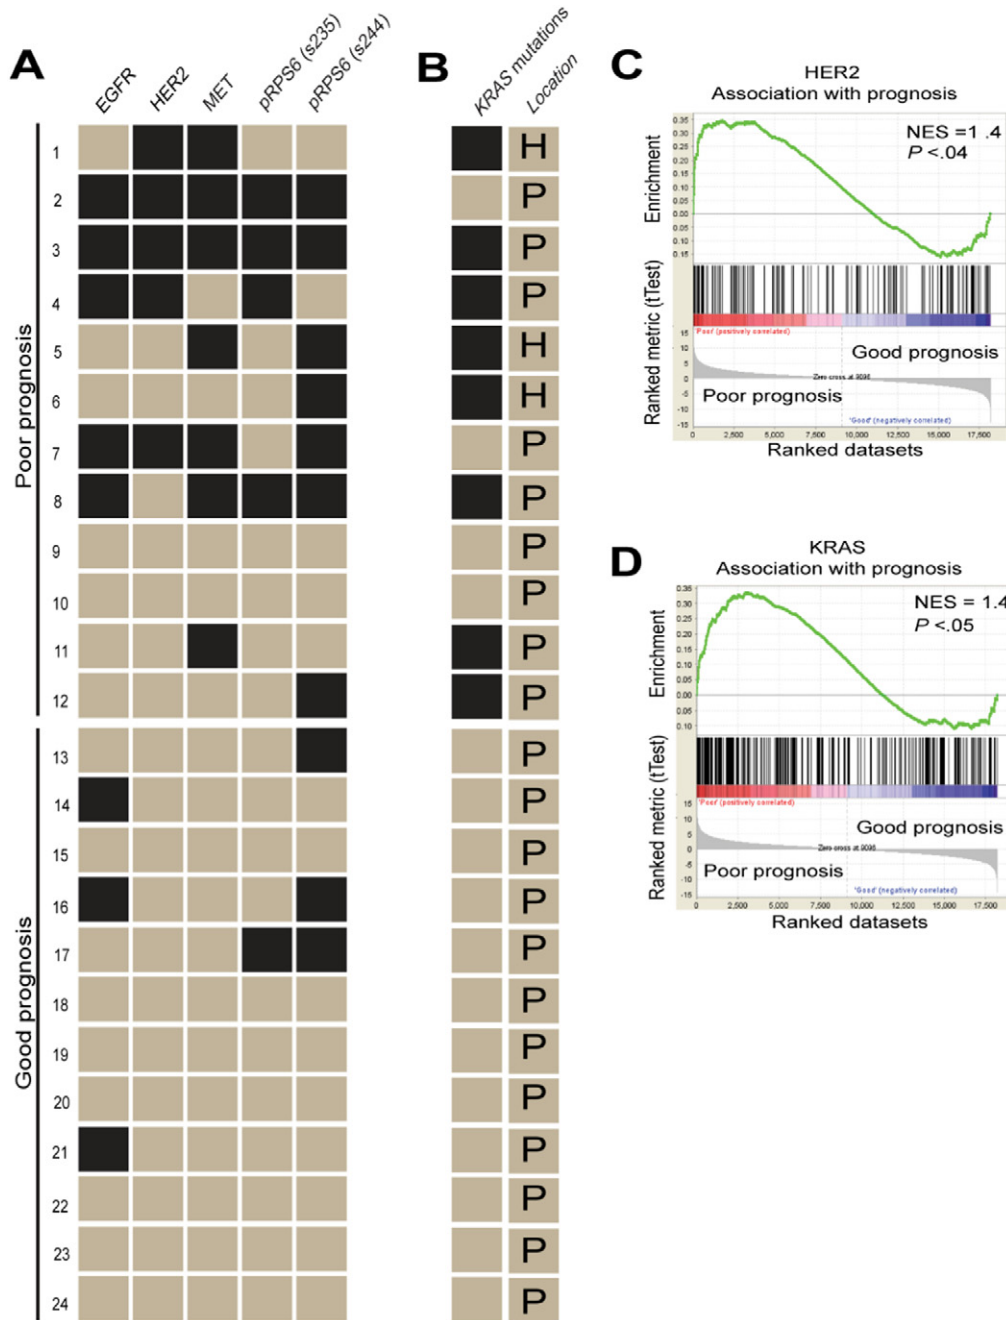

**Supplementary Figure 5.** Cross-activation of oncogenic pathways linked to prognosis. (A) Frozen serial tumor sections were stained with EGFR, MET, HER2, and pRPS6 (s235 and s244) antibodies. Expression levels were evaluated by *H*-score calculated by multiplying the staining intensity score (0, none; 1, weak; 2, moderate; 3, intense) by the percentage of cells stained at a given intensity (0–100). Image brightness parameters were adjusted across all comparison groups, and the median *H*-score in the poor prognosis group was used as the cutoff criterion for each staining. *Black squares* indicate a subject where the particular stain was above the cutoff. Numbers in the left margin denote individual patients. (B) The *KRAS* mutational status and location of tumors analyzed (P, peripheral; H, hilar). *Black squares* indicate subjects with mutated *KRAS*. (C and D) Gene set enrichment analysis showed enrichment and positive association of (C) HER2 and (D) KRAS with poor prognosis. The gene signatures were obtained from the Molecular Signatures Database.

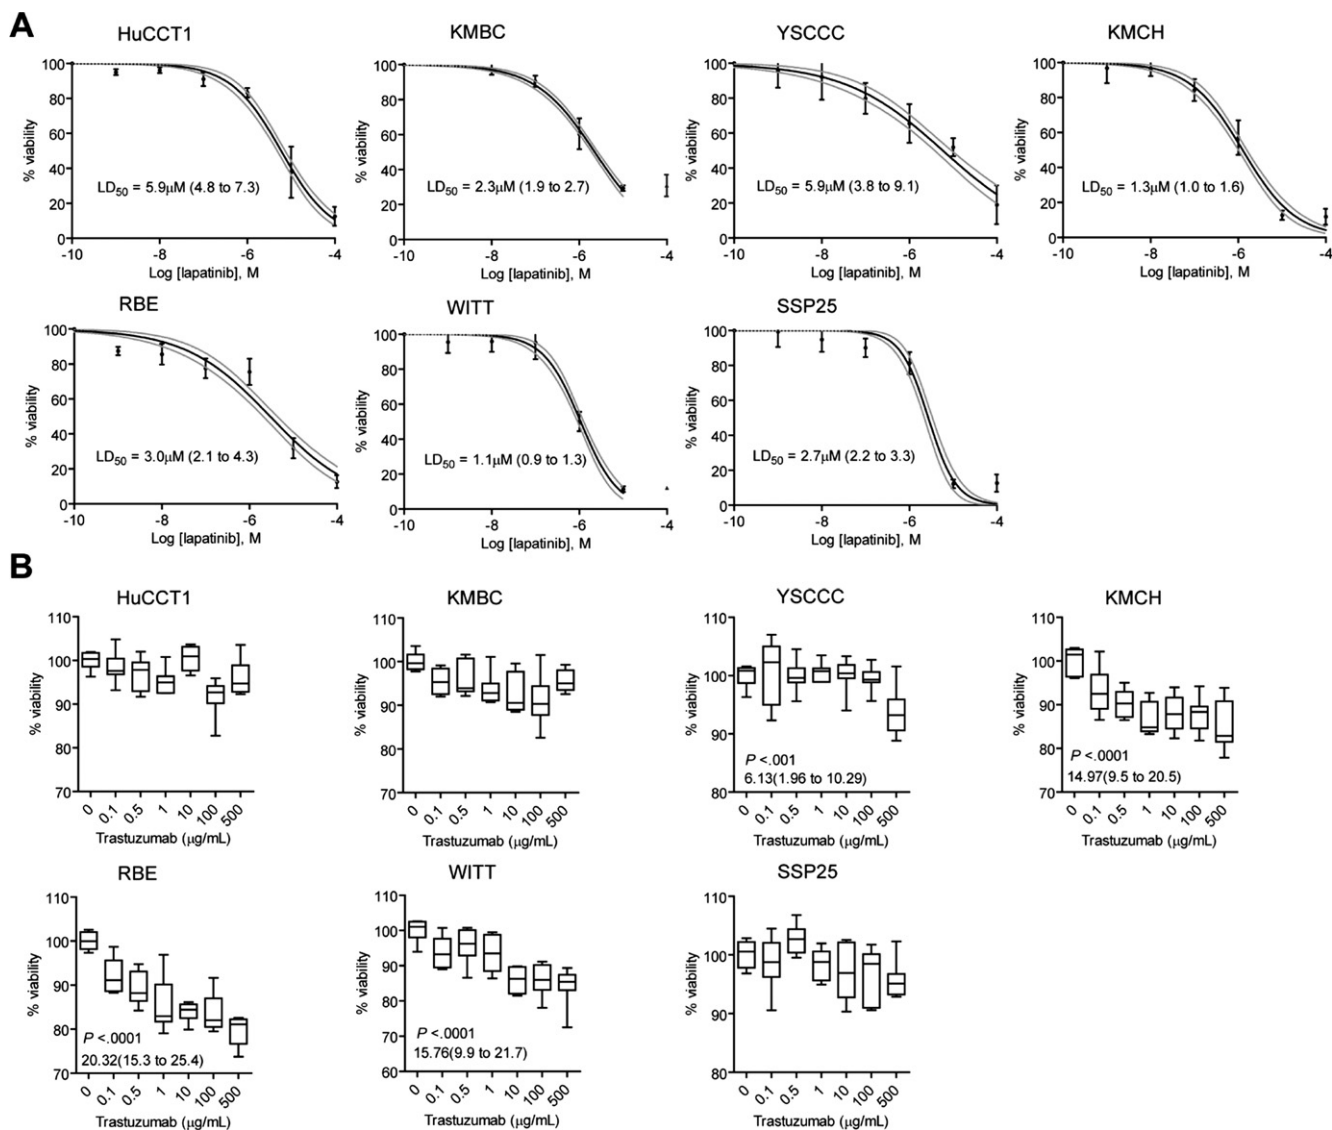



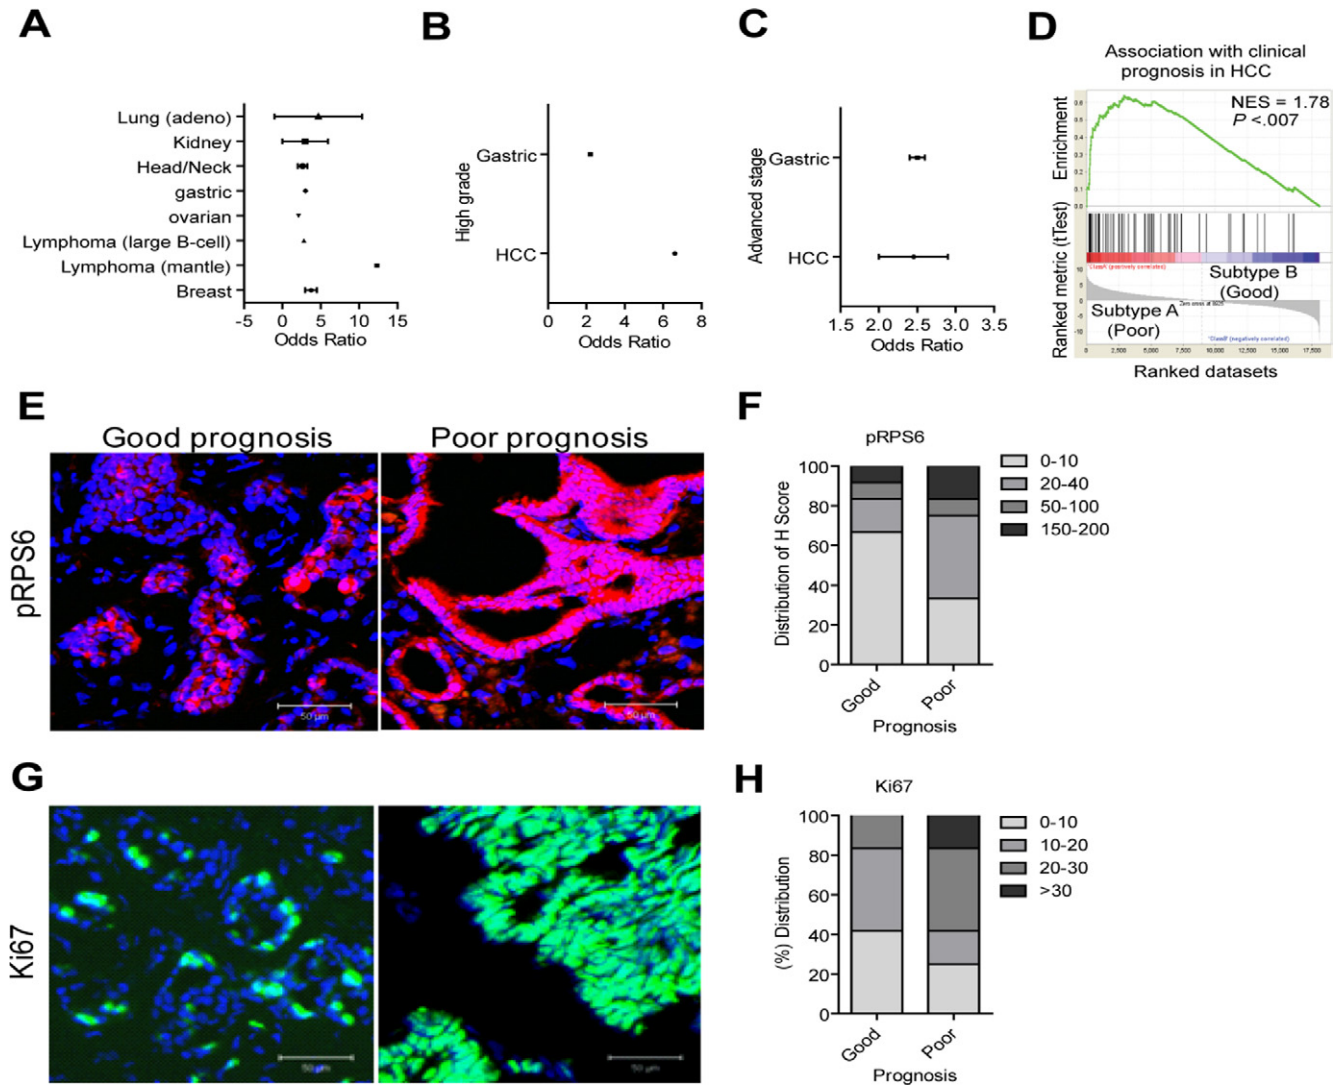

**Supplementary Figure 7.** Meta-analysis using the gene classifier. (A) The classifier was significantly associated with a study showing prognostic outcome if the odds ratio (OR) > 2 ( $P < .0001$ ). Forest plot represents the OR  $\pm$  95% CI. (B and C) Association of the classifier with (B) high-grade and (C) advanced-stage HCC and gastric cancers, respectively. (D) GSEA. The classifier showed a significant enrichment and positive correlation with poor prognosis HCC (subtype A). (E and F) Because meta-analysis of the classifier showed a significant association with pRPS6-positive HCC, immunohistochemical analyses of (E) the mTOR pathway and (G) proliferation were performed in representative tumor samples from each prognostic subgroup ( $n = 12$ ). (E and F) Tumors were stained for pRPS6 (E) and intensity of immunostaining was evaluated by  $H$ -score (distribution of bin values is shown in F). (G and H) Tumors in the poor prognostic group showed a higher rate of proliferation than tumors from patients with good prognosis. (G) Tumor samples from each prognostic subgroup ( $n = 12$ ) were stained for Ki67. (H) Distribution of tumors with different percentage of Ki67-positive cells (shown on the right). Scale bar = 50  $\mu$ m.



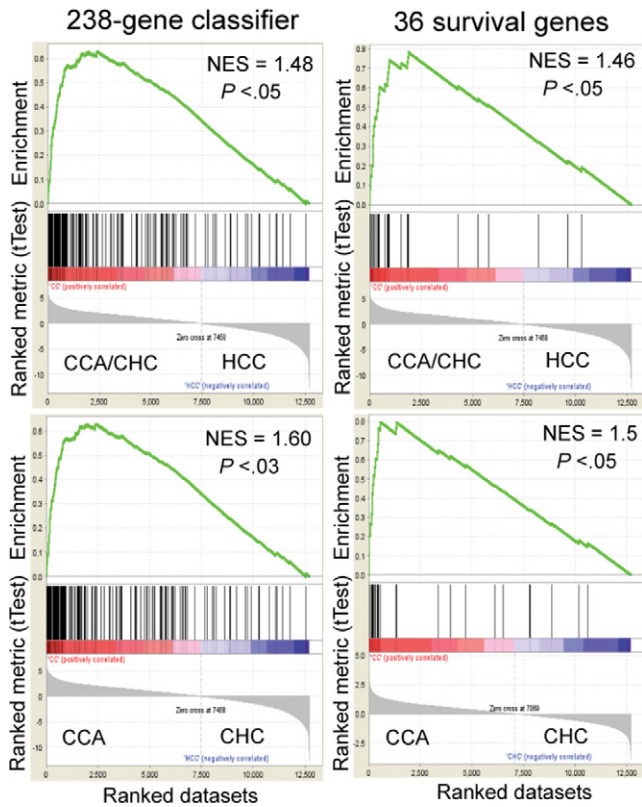

**Supplementary Figure 8.** Association of the gene classifier with CCA, hepatocellular CCA (CHC), and HCC. The 238-gene classifier and 36 survival genes showed significant enrichment and positive correlation with CCA compared with CHC and HCC, respectively. Data obtained from Woo et al.<sup>2</sup>
